# Supplementary material for: Selective Depletion of Antigen-Specific Antibodies for the Treatment of Demyelinating Disease
Source: PubMed Central journal article supplement (PMC7934575; doi:10.1016/j.ymthe.2020.11.017), 2020-11-17
Supplement: mmc1.pdf [file mmc1.pdf]

**YMTHE, Volume 29**

## **Supplemental Information**

### **Selective Depletion of Antigen-Specific**

### **Antibodies for the Treatment of Demyelinating Disease**

**Wei Sun, Priyanka Khare, Xiaoli Wang, Dilip K. Challa, Benjamin M. Greenberg, Raimund J. Ober, and E. Sally Ward**

## Supplemental figures and legends

### Supplemental figure 1

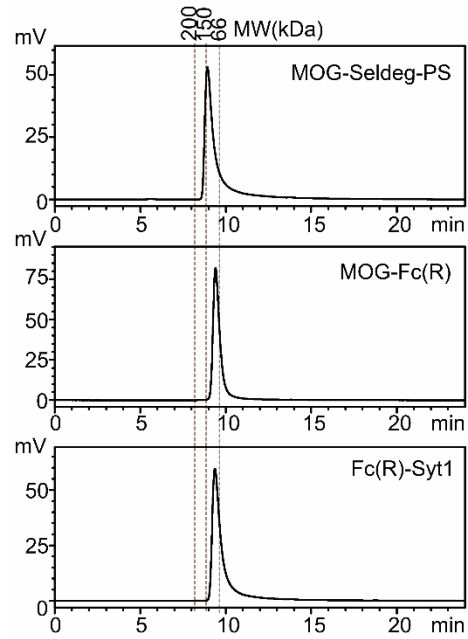

**Figure S1. The purified Fc fusions have no detectable aggregates.** Gel filtration chromatography analyses of purified Fc fusions with elution times of molecular weight (MW) standards indicated by dotted black lines.

## Supplemental figure 2

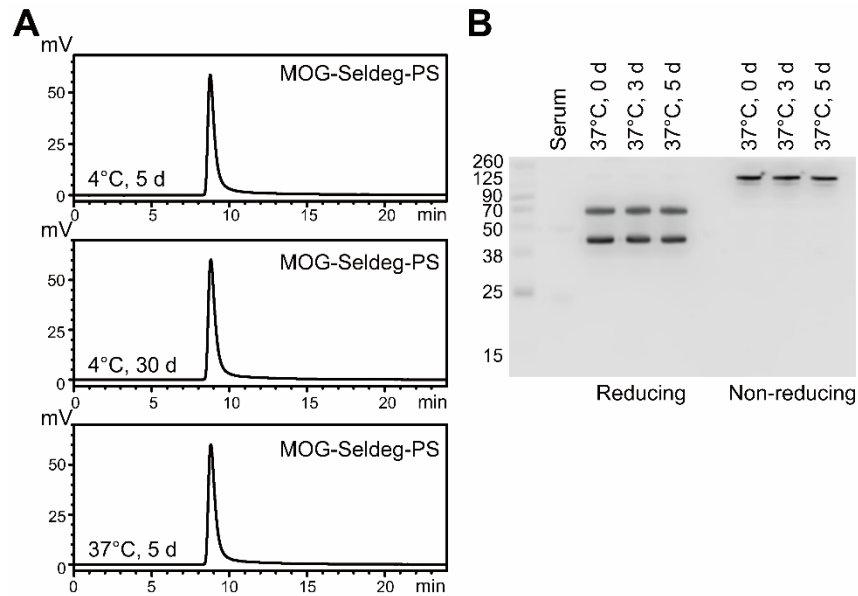

**Figure S2. Stability analyses of MOG-Seldeg-PS.** (A) MOG-Seldeg-PS was stored in PBS at 37°C for 5 days (5 d) or 4°C for 5 (5 d) or 30 days (30 d) followed by analyses using a Phenomenex Yarra SEC-3000 column. (B) MOG-Seldeg-PS was incubated at 37°C for 0, 3 or 5 days in IgG-depleted human serum at a concentration of 400 nM. Following incubation, MOG-Seldeg-PS was immunoprecipitated using goat anti-human IgG (Fc-specific)-agarose beads and analyzed by immunoblotting using goat anti-human (H+L) antibody conjugated to HRP. Sizes of molecular weight standards are shown in kDa on the left margin. Data shown are representative of two independent experiments.

**Supplemental figure 3**

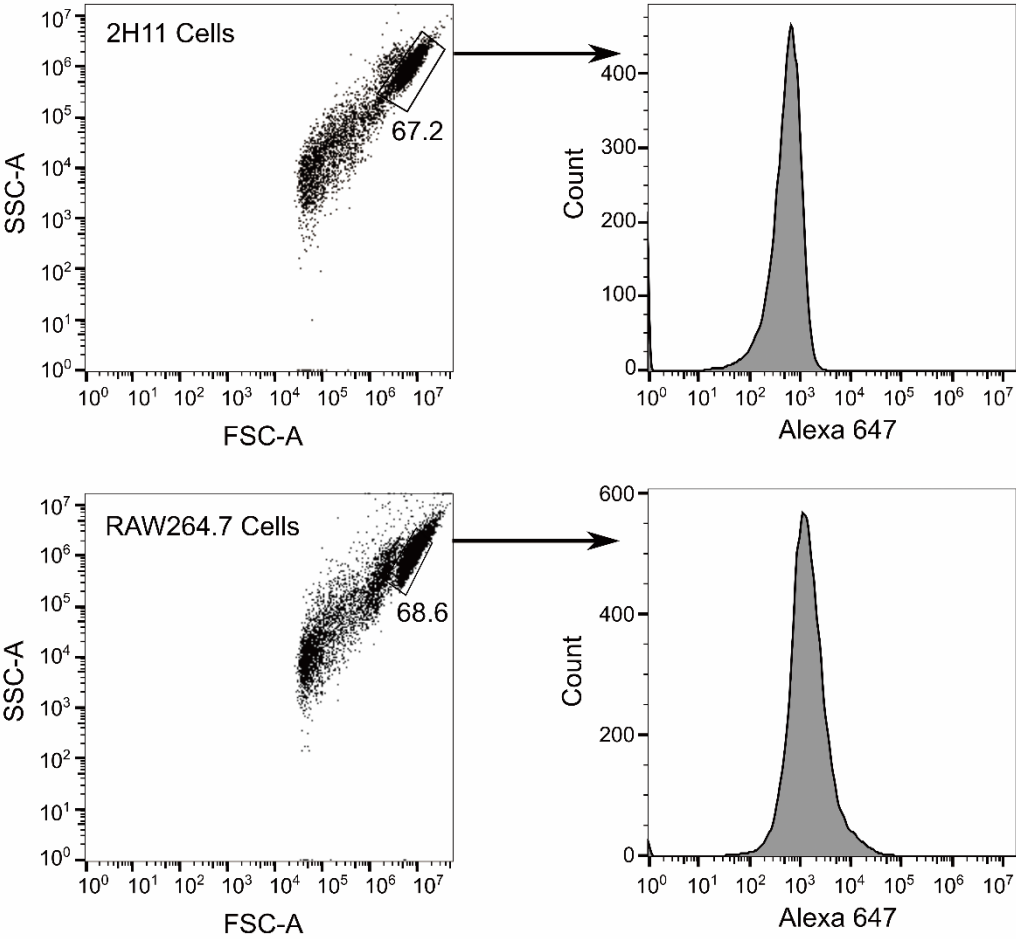

**Figure S3. Gating strategy used in flow cytometry.** The plots show representative gating strategies, using forward scatter area (FSC-A) and side scatter area (SSC-A) displays, to identify live 2H11 and RAW264.7 cell populations for the analyses presented in Figure 1D, E, and Figure 2A.

#### Supplemental figure 4

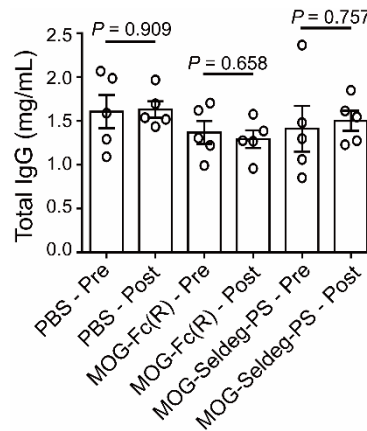

**Figure S4. Delivery of MOG-Seldeg-PS does not affect total serum IgG levels in mice.** Serum samples were isolated from mice immediately prior to ('pre'), and 48 hours following ('post'), injection of MOG-Seldeg-PS (40  $\mu$ g), MOG-Fc(R) (31  $\mu$ g) or PBS. Serum IgG levels were determined by ELISA and mean values for each time point/mouse group (n = 5 mice/group) are shown. Error bars indicate SEM. Differences for IgG levels before and after treatment were not significant ( $P > 0.05$ ; unpaired two-tailed Student's t-test). Data shown are representative of two independent experiments.

### Supplemental figure 5

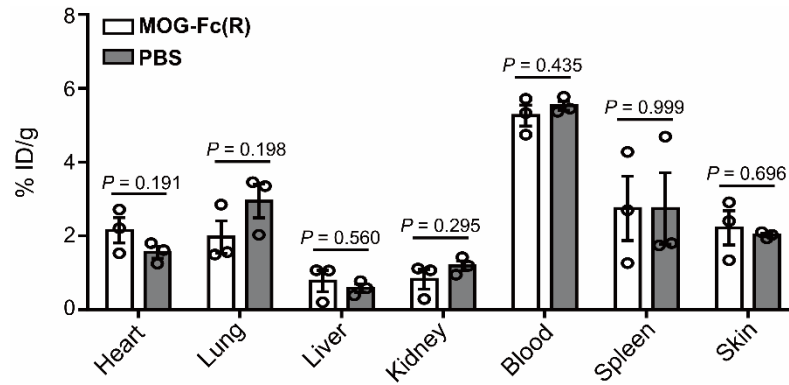

**Figure S5. Treatment with control protein, MOG-Fc(R) or PBS vehicle has similar effects on the biodistribution of MOG-specific antibody.** Transgenic mice expressing huFcγRs were intravenously injected with radiolabeled (<sup>125</sup>I) ch8-18C5 (15 μg). 24 h following ch8-18C5 delivery, mice were intravenously injected with MOG-Fc(R) (31 μg) or PBS vehicle (n = 3 mice/group). Blood and organs were harvested 6 h following MOG-Fc(R) or PBS delivery (30 h after injection of ch8-18C5). Data shown are mean values of percentage injected dose per gram (% ID/g) for blood or organs. Error bars indicate SEM and *P* values indicating no significant differences (*P* > 0.05; unpaired two-tailed Student's *t*-test) between the two treatments are shown.
